# Supplementary material for: Pausing methotrexate prevents impairment of Omicron BA.1 and BA.2 neutralisation after COVID-19 booster vaccination
Source: PubMed Central journal article supplement — RMD Open. 2022 Oct 10;8(2):e002639. doi: 10.1136/rmdopen-2022-002639 (PMC9556747; doi:10.1136/rmdopen-2022-002639), 2022-10-10
Supplement: rmdopen-2022-002639supp001.pdf [file rmdopen-2022-002639supp001.pdf]

## ICMJE DISCLOSURE FORM

**Date:** 6/11/2022

**Your Name:** Robert Biesen

**Manuscript Title:** Impaired Neutralization of SARS-CoV-2 Including Omicron Variants after COVID-19 mRNA Booster Immunization under Methotrexate Therapy

**Manuscript Number (if known):** Not yet available

In the interest of transparency, we ask you to disclose all relationships/activities/interests listed below that are related to the content of your manuscript. “Related” means any relation with for-profit or not-for-profit third parties whose interests may be affected by the content of the manuscript. Disclosure represents a commitment to transparency and does not necessarily indicate a bias. If you are in doubt about whether to list a relationship/activity/interest, it is preferable that you do so.

The author’s relationships/activities/interests should be defined broadly. For example, if your manuscript pertains to the epidemiology of hypertension, you should declare all relationships with manufacturers of antihypertensive medication, even if that medication is not mentioned in the manuscript.

In item #1 below, report all support for the work reported in this manuscript without time limit. For all other items, the time frame for disclosure is the past 36 months.

|                                                           |                                                                                                                                                                                | <b>Name all entities with whom you have this relationship or indicate none (add rows as needed)</b> | <b>Specifications/Comments (e.g., if payments were made to you or to your institution)</b> |
|-----------------------------------------------------------|--------------------------------------------------------------------------------------------------------------------------------------------------------------------------------|-----------------------------------------------------------------------------------------------------|--------------------------------------------------------------------------------------------|
| <b>Time frame: Since the initial planning of the work</b> |                                                                                                                                                                                |                                                                                                     |                                                                                            |
| <b>1</b>                                                  | All support for the present manuscript (e.g., funding, provision of study materials, medical writing, article processing charges, etc.)<br><b>No time limit for this item.</b> | <input type="checkbox"/> None                                                                       |                                                                                            |
|                                                           |                                                                                                                                                                                | Freunde und Förderer der Berliner Charité e.V.                                                      | Unconditional donation                                                                     |
|                                                           |                                                                                                                                                                                | medac GmbH                                                                                          | Unconditional donation                                                                     |
|                                                           |                                                                                                                                                                                | Galapagos NV                                                                                        | Unconditional donation                                                                     |
|                                                           |                                                                                                                                                                                | COVIM: NaFoUniMedCovid19 (FKZ: 01KX2021)                                                            | Financial support to Leif Sander (Berlin), Florian Kurth (Berlin), Florian Klein (Cologne) |
|                                                           |                                                                                                                                                                                | Federal Institute for Drugs and Medical Devices (V-2021.3 / 1503_68403 / 2021-2022)                 | Financial support to Leif Sander (Berlin) and Florian Kurth (Berlin)                       |
|                                                           |                                                                                                                                                                                | German Center for Infection Research (DZIF)                                                         | Florian Klein (Cologne)                                                                    |
|                                                           |                                                                                                                                                                                | Deutsche Forschungsgemeinschaft (DFG)                                                               | CRC1310 to Florian Klein (Cologne) and SFB-TR84 to Leif Sander (Berlin).                   |
| <b>Time frame: past 36 months</b>                         |                                                                                                                                                                                |                                                                                                     |                                                                                            |

|          |                                                                                                              | <b>Name all entities with whom you have this relationship or indicate none (add rows as needed)</b>                                                                                                                          | <b>Specifications/Comments (e.g., if payments were made to you or to your institution)</b> |  |  |  |  |  |  |
|----------|--------------------------------------------------------------------------------------------------------------|------------------------------------------------------------------------------------------------------------------------------------------------------------------------------------------------------------------------------|--------------------------------------------------------------------------------------------|--|--|--|--|--|--|
| <b>2</b> | Grants or contracts from any entity (if not indicated in item #1 above).                                     | <input checked="" type="checkbox"/> <b>None</b><br><br><table border="1" style="width:100%;"><tr><td style="width:50%;"></td><td style="width:50%;"></td></tr><tr><td></td><td></td></tr><tr><td></td><td></td></tr></table> |                                                                                            |  |  |  |  |  |  |
|          |                                                                                                              |                                                                                                                                                                                                                              |                                                                                            |  |  |  |  |  |  |
|          |                                                                                                              |                                                                                                                                                                                                                              |                                                                                            |  |  |  |  |  |  |
|          |                                                                                                              |                                                                                                                                                                                                                              |                                                                                            |  |  |  |  |  |  |
| <b>3</b> | Royalties or licenses                                                                                        | <input checked="" type="checkbox"/> <b>None</b><br><br><table border="1" style="width:100%;"><tr><td style="width:50%;"></td><td style="width:50%;"></td></tr><tr><td></td><td></td></tr><tr><td></td><td></td></tr></table> |                                                                                            |  |  |  |  |  |  |
|          |                                                                                                              |                                                                                                                                                                                                                              |                                                                                            |  |  |  |  |  |  |
|          |                                                                                                              |                                                                                                                                                                                                                              |                                                                                            |  |  |  |  |  |  |
|          |                                                                                                              |                                                                                                                                                                                                                              |                                                                                            |  |  |  |  |  |  |
| <b>4</b> | Consulting fees                                                                                              | <input checked="" type="checkbox"/> <b>None</b><br><br><table border="1" style="width:100%;"><tr><td style="width:50%;"></td><td style="width:50%;"></td></tr><tr><td></td><td></td></tr><tr><td></td><td></td></tr></table> |                                                                                            |  |  |  |  |  |  |
|          |                                                                                                              |                                                                                                                                                                                                                              |                                                                                            |  |  |  |  |  |  |
|          |                                                                                                              |                                                                                                                                                                                                                              |                                                                                            |  |  |  |  |  |  |
|          |                                                                                                              |                                                                                                                                                                                                                              |                                                                                            |  |  |  |  |  |  |
| <b>5</b> | Payment or honoraria for lectures, presentations, speakers bureaus, manuscript writing or educational events | <input checked="" type="checkbox"/> <b>None</b><br><br><table border="1" style="width:100%;"><tr><td style="width:50%;"></td><td style="width:50%;"></td></tr><tr><td></td><td></td></tr><tr><td></td><td></td></tr></table> |                                                                                            |  |  |  |  |  |  |
|          |                                                                                                              |                                                                                                                                                                                                                              |                                                                                            |  |  |  |  |  |  |
|          |                                                                                                              |                                                                                                                                                                                                                              |                                                                                            |  |  |  |  |  |  |
|          |                                                                                                              |                                                                                                                                                                                                                              |                                                                                            |  |  |  |  |  |  |
| <b>6</b> | Payment for expert testimony                                                                                 | <input checked="" type="checkbox"/> <b>None</b><br><br><table border="1" style="width:100%;"><tr><td style="width:50%;"></td><td style="width:50%;"></td></tr><tr><td></td><td></td></tr><tr><td></td><td></td></tr></table> |                                                                                            |  |  |  |  |  |  |
|          |                                                                                                              |                                                                                                                                                                                                                              |                                                                                            |  |  |  |  |  |  |
|          |                                                                                                              |                                                                                                                                                                                                                              |                                                                                            |  |  |  |  |  |  |
|          |                                                                                                              |                                                                                                                                                                                                                              |                                                                                            |  |  |  |  |  |  |
| <b>7</b> | Support for attending meetings and/or travel                                                                 | <input checked="" type="checkbox"/> <b>None</b><br><br><table border="1" style="width:100%;"><tr><td style="width:50%;"></td><td style="width:50%;"></td></tr><tr><td></td><td></td></tr><tr><td></td><td></td></tr></table> |                                                                                            |  |  |  |  |  |  |
|          |                                                                                                              |                                                                                                                                                                                                                              |                                                                                            |  |  |  |  |  |  |
|          |                                                                                                              |                                                                                                                                                                                                                              |                                                                                            |  |  |  |  |  |  |
|          |                                                                                                              |                                                                                                                                                                                                                              |                                                                                            |  |  |  |  |  |  |

|                                                                                        |                                                                                                   | <b>Name all entities with whom you have this relationship or indicate none (add rows as needed)</b> | <b>Specifications/Comments (e.g., if payments were made to you or to your institution)</b> |
|----------------------------------------------------------------------------------------|---------------------------------------------------------------------------------------------------|-----------------------------------------------------------------------------------------------------|--------------------------------------------------------------------------------------------|
| <b>8</b>                                                                               | Patents planned, issued or pending                                                                | <input checked="" type="checkbox"/> <b>None</b>                                                     |                                                                                            |
|                                                                                        |                                                                                                   |                                                                                                     |                                                                                            |
|                                                                                        |                                                                                                   |                                                                                                     |                                                                                            |
| <b>9</b>                                                                               | Participation on a Data Safety Monitoring Board or Advisory Board                                 | <input checked="" type="checkbox"/> <b>None</b>                                                     |                                                                                            |
|                                                                                        |                                                                                                   |                                                                                                     |                                                                                            |
|                                                                                        |                                                                                                   |                                                                                                     |                                                                                            |
| <b>10</b>                                                                              | Leadership or fiduciary role in other board, society, committee or advocacy group, paid or unpaid | <input checked="" type="checkbox"/> <b>None</b>                                                     |                                                                                            |
|                                                                                        |                                                                                                   |                                                                                                     |                                                                                            |
|                                                                                        |                                                                                                   |                                                                                                     |                                                                                            |
| <b>11</b>                                                                              | Stock or stock options                                                                            | <input checked="" type="checkbox"/> <b>None</b>                                                     |                                                                                            |
|                                                                                        |                                                                                                   |                                                                                                     |                                                                                            |
|                                                                                        |                                                                                                   |                                                                                                     |                                                                                            |
| <b>12</b>                                                                              | Receipt of equipment, materials, drugs, medical writing, gifts or other services                  | <input checked="" type="checkbox"/> <b>None</b>                                                     |                                                                                            |
|                                                                                        |                                                                                                   |                                                                                                     |                                                                                            |
|                                                                                        |                                                                                                   |                                                                                                     |                                                                                            |
| <b>13</b>                                                                              | Other financial or non-financial interests                                                        | <input checked="" type="checkbox"/> <b>None</b>                                                     |                                                                                            |
|                                                                                        |                                                                                                   |                                                                                                     |                                                                                            |
|                                                                                        |                                                                                                   |                                                                                                     |                                                                                            |
| <b>Please place an "X" next to the following statement to indicate your agreement:</b> |                                                                                                   |                                                                                                     |                                                                                            |

|                                     | <b>Name all entities with whom you have this relationship or indicate none (add rows as needed)</b>                  | <b>Specifications/Comments (e.g., if payments were made to you or to your institution)</b> |
|-------------------------------------|----------------------------------------------------------------------------------------------------------------------|--------------------------------------------------------------------------------------------|
| <input checked="" type="checkbox"/> | I certify that I have answered every question and have not altered the wording of any of the questions on this form. |                                                                                            |
